# Supplementary material for: Comparative Assessment of Severe Acute Respiratory Syndrome Coronavirus 2 Variants in the Ferret Model
Source: PubMed Central journal article supplement (PMC9600705; doi:10.1128/mbio.02421-22), 2022-09-22
Supplement: mbio.02421-22-s0005.pdf [file mbio.02421-22-s0005.pdf]

| <b>Virus (WHO variant)</b> | <b>Pangolin Lineage</b> | <b>Name in the Study</b> | <b>GISAID ID#</b> | <b>Passage History</b> | <b>Amino Acid Mutations in S Protein</b>                              |
|----------------------------|-------------------------|--------------------------|-------------------|------------------------|-----------------------------------------------------------------------|
| USA-WA1/2020               |                         | WA1                      | EPI_ISL_404895    | P5                     | D614                                                                  |
| Alpha                      | B.1.1.7                 | Alpha                    | EPI_ISL_876595    | P1                     | H69/V70del, Y144del, N501Y, A570D, D614G, P681H, T716I, S982A, D1119H |
| Beta                       | B.1.351                 | Beta                     | EPI_ISL_1169500   | P1                     | D80A, D215G, L241/L242/A243del, K417N, E484K, N501Y, D614G, A701V     |
| Delta                      | B.1.617.2               | Delta                    | EPI_ISL_1823618   | P2-plaque purified     | T19R, E156/F157del, R158G, L452R, T478K, D614G, P681R, D950N          |
