# Supplementary material for: Comparative Assessment of Severe Acute Respiratory Syndrome Coronavirus 2 Variants in the Ferret Model
Source: PubMed Central journal article supplement (PMC9600705; doi:10.1128/mbio.02421-22), 2022-09-22
Supplement: mbio.02421-22-s0006.pdf [file mbio.02421-22-s0006.pdf]

| Virus | Experiment <sup>b</sup> | Normalized OD <sub>450</sub> Ferret IgG <sup>a</sup> |                                           |
|-------|-------------------------|------------------------------------------------------|-------------------------------------------|
|       |                         | Inoculated Group<br>(19-20 d.p.i.) <sup>c</sup>      | Contact Group<br>(19 d.p.c.) <sup>c</sup> |
| WA1   | DCT                     | 1.30                                                 | 0.68                                      |
|       |                         | 0.61                                                 | Negative                                  |
|       |                         | 0.97                                                 | 1.04                                      |
|       | RDT                     | 1.14                                                 | Negative                                  |
|       |                         | 0.90                                                 | Negative                                  |
|       |                         | 0.84                                                 | Negative                                  |
| Alpha | DCT                     | 2.02                                                 | Negative                                  |
|       |                         | 1.56                                                 | Negative                                  |
|       |                         | 2.04                                                 | Negative                                  |
|       | RDT                     | 2.09                                                 | Negative                                  |
|       |                         | 2.03                                                 | Negative                                  |
|       |                         | 2.09                                                 | Negative                                  |
| Beta  | DCT                     | Negative                                             | Negative                                  |
|       |                         | Negative                                             | Negative                                  |
|       |                         | Negative                                             | Negative                                  |
|       | RDT                     | Negative                                             | Negative                                  |
|       |                         | Negative                                             | Negative                                  |
|       |                         | Negative                                             | Negative                                  |
| Delta | DCT                     | 1.70                                                 | 1.77                                      |
|       |                         | 1.50                                                 | 1.37                                      |
|       |                         | 1.70                                                 | 2.15                                      |
|       | RDT                     | 1.56                                                 | Negative                                  |
|       |                         | 1.51                                                 | Negative                                  |
|       |                         | 1.77                                                 | 1.74                                      |
