# Supplementary material for: Comparative Assessment of Severe Acute Respiratory Syndrome Coronavirus 2 Variants in the Ferret Model
Source: PubMed Central journal article supplement (PMC9600705; doi:10.1128/mbio.02421-22), 2022-09-22
Supplement: mbio.02421-22-s0007.pdf [file mbio.02421-22-s0007.pdf]

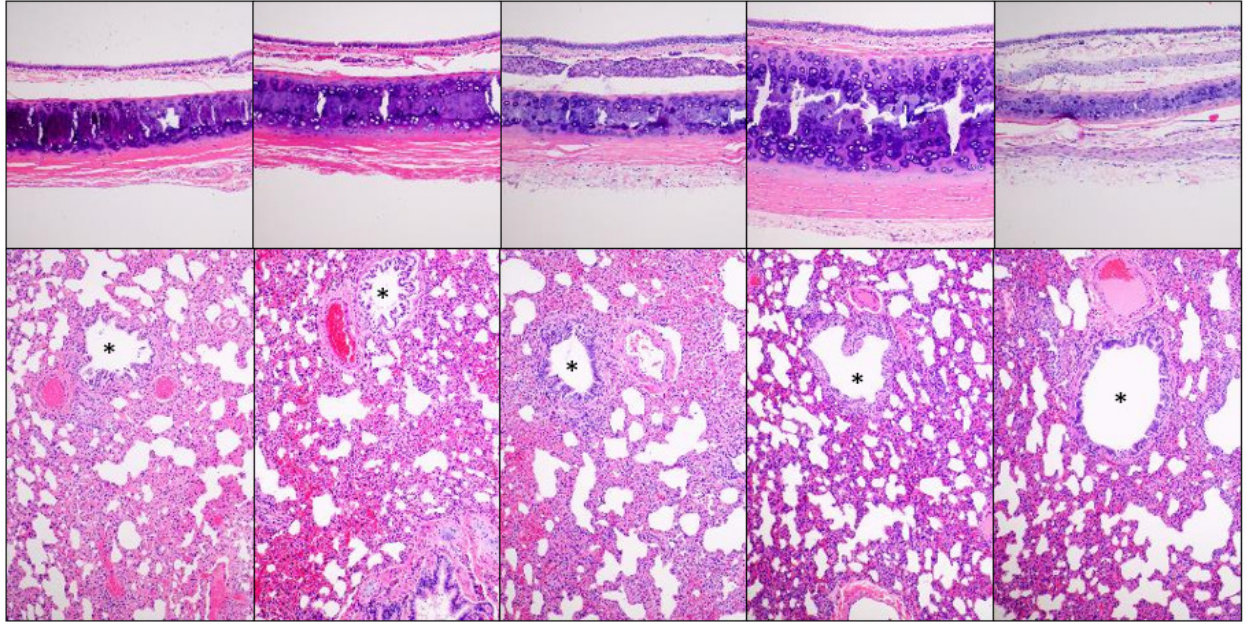

Naïve

WA1

Alpha

Beta

Delta
